# Supplementary material for: Response of Wheat DREB Transcription Factor to Osmotic Stress Based on DNA Methylation
Source: Int J Mol Sci. 2021 Jul 18;22(14):7670. doi: 10.3390/ijms22147670 (PMC8307787; doi:10.3390/ijms22147670)
Supplement: Supplementary file 1 [file ijms-22-07670-s001.zip › ijms-1300145-supplementary.pdf]

## Supporting information

**Figure S1 The sequences of wheat *DREB* genes.** (a), (b) and (c) represent the nucleotide sequence and amino acid sequence of *DREB2*, *DREB6* and *Wdreb2*, respectively. The box and underline denote nuclear localization signal and AP2/EREBP domain, respectively.

**Figure S2 Alignments of wheat DREBs.** (a) and (b) represent the alignments of AP2/EREBP domain and amino acid sequence of *DREB2*, *DREB6* and *Wdreb2*. The similar and consistent amino acids are indicated in blue or dark blue, respectively.  $\beta$ -sheet and  $\alpha$ -helix are indicated with long arrow and dotted line, the conserved residues at 14<sup>th</sup> and 19<sup>th</sup> are marked with short arrow.

**Figure S3 Multiple alignment of wheat DREBs and its homologous sequences.** (a), (b) and (c) are the alignment on some homologous sequences of wheat *DREB2*, *DREB6* and *Wdreb2*, respectively. The underline denotes the AP2/EREBP domain.

**Figure S4 Promoter regions of wheat *DREB* genes.** (a), (b) and (c) represent the promoter sequences and some *cis*-acting elements of *DREB2*, *DREB6* and *Wdreb2*, respectively.

**Figure S5 Prediction of CpG islands in the promoter regions of wheat *DREB* genes.** (a), (b) and (c) represent the location of putative CpG islands in the promoter regions of *DREB2*, *DREB6* and *Wdreb2*, respectively. The CpG island regions between two arrows below each diagram were examined using BSP, respectively.

**Figure S6 Bisulfite sequencing analysis on the promoter regions of wheat *DREB* genes using CyMATE.** (a), (b) and (c) indicate methylation sites in the promoter regions of *DREB2*, *DREB6* and *Wdreb2* in wheat leaves. Circles, squares and triangles represent CG, CHG or CHH, filled and hollow circles denote methylated and unmethylated cytosine. Each row represents the sequencing result of one positive clone. The length of CpG island sequence is visualized above each diagram and the potential methylation sites are displayed below.

### **Table S1 Homologous amino acid sequences of wheat DREBs by BLASP**

The homologous sequences of wheat *DREB2*, *DREB6* and *Wdreb2* were retrieved with BlastP algorithm, which are mainly from some species in Gramineae. The homologous sequences having higher identity with wheat DREBs were selected from some Genera in Gramineae, and were further analyzed.

### **Table S2 The *cis*-acting elements in the promoter of *DREB2***

### **Table S3 The *cis*-acting elements in the promoter of *DREB6***

### **Table S4 The *cis*-acting elements in the promoter of *Wdreb2***

**Table S5 Correlation between promoter methylation and expression of *DREB* genes.** Pearson's *r* represents the relationship between expression levels of *DREB2*, *DREB6*, *Wdreb2* in wheat leaves and methylation rates at CG, CHG or CHH sites in their promoter regions under the treatment of 15% PEG<sub>6000</sub> solution. According to the expression level and methylation rate when wheat seedlings incubated in PEG<sub>6000</sub> solution for 12 h, Pearson's *r* analysis of *DREBs* were performed.

### **Table S6 Primers used in this study**

(a)

```
1      CTACTCCCTGCACGGTCTCCCATTAACACGAGCGAGCGCGTGCATCTCATACGGGCACGCGGGGTACGTGGT
76     GCTCTCTGCGCGCACATGGCGGCGAGCGAGCAGAGCTCCGAGTCTCGTCGACGTCCTGCACCTTCTCTACTCC
1      M A A S E Q S S E S S S T S C T S S Y S
151    ACGTCTCTCGTGTCTCCCCAGGGCCGACGACAAGAAGCGGAACGGCGGGCGGCAAGCGGAAGCGCGACGCGGGCC
21     T S S C S P R A D D K K R N G G G K R K R A A A A
226    GACGAGGAGCCGGCCCCGGCGGCGGCGGCGGCGTCTGATCGCGGCGTGC GGATGCGGGCGTGGGGCAAGTGGGTG
46     D E E P A P A A A A A S Y R G V R M R A W G K W V
301    TCGGAGATCAGGGAGCCGCGCAAGAAGTCCCGCATCTGGCTCGGCACCTTCCCGTCCCCGGAGATGGCCGCGCGC
71     S E I R E P R K K S R I W L G T F P C P E M A A R
376    GCCCACGACGCCGCGCGCTCAGCATCAAGGGCGCCCCGCGCGCTTGCTTAACCTCCCGGACCTCGCGCCCCGCGCTC
96     A H D A A A L S I K G A R A V L N F P D L A P A L
451    CCTCGCCCGGCTCCCTCGCCCCGTGCGACGTCCAGGCCCGCCGCGCGCGCCCGCTCATGCACGACCACGAC
121    P R P A S L A P C D V Q A A A A R A A L M H D H D
526    CACCACTGCTGCTCCGCTCAACCTCCCCCGCGCGCGCGGACTCCGCGCGGGCAATGCCCGCGGCCATGC
146    H Q C C S A S T S P A A P D S A R G N A P A P C
601    GACGACCCGCGCGCGAGACGAGCCGAGCATGAGCCGCGTTCAGCCGAGCCAGGGAAATGAGCAGACCTC
171    D Q P A A R D E P E H E P P F Q P S Q G N E Q Q L
676    ACGGCTGCACAGGTGGAGATGGTGTTCGACGAGCTGGCGCCGCTGTGGGTGGAGAACGTGGTGGATTTCGCGCCG
196    T A A Q V E M V F D E L A P L W V E N V V D F A P
751    TCCGATCACTGCTGGACGGCGTACGATTGTCTCGACCCAATCGGCTTCCAGCCTCTCTGTGGGAGTATTAGGCT
221    S D H C W T A Y D C L D P I G F Q P L L W E Y
```

(b)

```
1      TCGTCCCTCTTCTCGCTCCATGGAGACCGGGGGTAGCAAGCGGGAAGGAGACTGCCCGGGCAGGAAAGgtgagc
1      M E T G G S K R E G D C P G Q E [R]
76     gccggaaccactccctccatctctacttctatcccgcgcgttttcgctcgaatctacgggcattgtctgagcgccg
151    ggcggcgccgcgtcgccgcgacatggaatttgcgcgtgtttccgcggttggtcggtgctgtgaaacatgcccatc
226    taaagcagttatccgctactcgtttcctgttacccgcgcgcgtgtcggaactagtcgtaggtcgccggtggtcgcc
301    ctaggctcgatggtctcctccagttcggttcgcgcggtttccgcgcggtgtagaattatggtttcctccgtcttc
376    tcggttggggattggagttcggcgagattcagagcggtgctggtggcgaactgtcggtgttgggtcggtgagcgccg
451    cgccgtcctctgaatcgatgcagaagtcccatgtccatggcgcggtcggggattgcccatgccaatggcggtgta
526    cgattgctggtgcacagcatcataaactatatcttcgggagctcgattcggttgggtaccacaacccaagtataaa
601    taatctccttgactttttccaccaaggaaacaaggatagccctgcttcgtttttagatttatacgaacttt
676    tttttctgtgagaaagattcatatgactctgactgcttattgttttgggtttcaactgttttcaccttgtgata
751    tggattgccttgatgaacagGAAGAAGAAAGTGCAGGAGAAGCACTGGTCCTGATTGCTGAAACCATC
1      [K K K V R R] R S T G P D S V A E T I
826    AAGAAGTGAAGGAGGAAAACAGAAAGTCCAGCAAGAGAATGGATCCCGGAAAGCACCGGCCAAGGGTTCGAAG
36     K K W K E E N Q K L Q Q E N G S R K A P A K G S K
901    AAAGGGTGATGGCAGGGAAGGAGGTCCAGAGAATTCAAACCTGCGCTTACCGCGGTGTGAGGCAGAGGACGTGG
61     K G C M A G K G G P E N S N C A Y R G V R Q R T W
976    GGGAAATGGGTGTGATGATCCGTGAGCCCAACCGTGGCAATCGGCTGTGGCTTGGTTCAITCCCTACCGCAGTC
86     G K W V A E I R E P N R G N R L W L G S F P T A V
1051   GAAGCTGCACGTGCATATGATGATGCGGCAAGGGCAATGTATGGCGCCAAAGCACGTGTCAACTTCTCAGAGCAG
111    E A A R A Y D D A A R A M Y G A K A R V N F S E Q
1126   TCCCCGGATGCCAATCTGGTTGCACGCTGGCACCTCCATTGCCGATGCTAATGGGGCAACCGCTGCGTCACAT
136    S P D A N S G C T L A P P L P M S N G A T A A S H
1201   CCTTCTGATGGGAAGGATGAATCGGAGTCTCCTCCTTCTCTTATCTCAAATGCGCGACAGCTGCGCTGCATCGG
161    P S D G K D E S E S P P S L I S N A P T A A L H R
1276   TCTGATGCTAAGGATGAGTCTGAGTCTGAGGACCGTGGCACGTAAGGTGAAAAAAGAGTGAGCAATGATTG
186    S D A K D E S E S A G T V A R K V K K E V S N D L
1351   AGAAGTACCCATGAGGAGCACAAGACCTGGAAGTATCCCAACCAAAAGGGAAGGCTTTACATAAAGCAGCGAAC
211    R S T H E E H K T L E V S Q P K G K A L H K A A N
1426   GTAAGTTATGATTACTTCAACGTGAGGAAGTTCTTGACATGATAATTGTGGAATTGAGTGTGATGTAATAATG
235    V S Y D Y F N V E E V L D M I I V E L S A D V K M
1501   GAAGCACATGAAGAGTACCAAGATGGTGTATGGGTTTAGTCTTTCTCATATTAGGGTTTTAGCTATGAGGGT
261    E A H E E Y Q D G D D G F S L F S Y
```

(c)

```

1      AAGAAAACAGGCGACAAGATTGCGAACGCTAGATATCTGGACCCGATCCGGATCGGGTCGGCCATGACGGTAGAT
1                                          M T V D
76     CGGAAGCACGCCGAGGCGGCGGCGGCGGCCCTTCGAGATCCCGGCGCTCCAGCCTGGAAGGAAAAAGCGACCT
5      R K H A E A A A A A P F E I P A L Q P G R K K R P
151    CGGAGATCACGTGATGGGCCTAATTCAGTCTCTGAAACGATCAGGCGATGGAAAGAAGTGAACCAACAACCTGGAG
30     R R S R D G P N S V S E T I R R W K E V N Q Q L E
226    CATGATCCACAGGGTGCAAAGAGGGCGAGGAAGCCACCTGCAAAGGGTTCGAAGAAGGGCTGTATGCTGGGGAAA
55     H D P Q G A K R A R K P P A K G S K K G C M L G K
301    GGAGGACCTGAGAATACACAATGTGGATTCCGTGGTGTAAGGCAACGTACTTGGGGGAAGTGGGTTGTGAAATT
80     G G P E N T Q C G F R G V R Q R T W G K W V A E I
376    CGGGAGCCAAATCGGGTGAGCAGGCTCTGGCTGGGAACGTCCCCACTGCTGAGGATGCTGCCCGTGCTTATGAC
105    R E P N R V S R L W L G T F P T A E D A A R A Y D
451    GAGGCAGCCAGAGCAATGTATGGCGCACTGGCTCGTACCAACTTCCCTGTGCATCCTGCACAAGCTCCTGCTGTG
130    E A A R A M Y G A L A R T N F P V H P A Q A P A V
526    GCTGTACCAGCGCAATCGAAGGTGTTGTACGTGGTCTCAGCATCATGCGAGTCTACTACAACCTCCACCAAC
155    A V P A A I E G V V R G A S A S C E S T T T S T N
601    CACTCAGATGTTGCTTCTCCTTGCCGAGACAGCTCAAGCTCCTGAGATTACTCCCAGCCAGATGCGCTTGAG
180    H S D V A S S L P R Q A Q A P E I Y S Q P D A L E
676    TCCACAGAATCAGTTGTGCTGGAGTCTGTGCGAGCATTACAGCCATCAAGACACTGTTCTGACGCTGGCTCAAGC
205    S T E S V V L E S V E H Y S H Q D T V P D A G S S
751    ATTTCAAGGAGCACATCCGAAGAGGATGTGTTGAGCCATTGGAGCCTATTCCAGTTTGGCGGATGGAGAAGCA
230    I S R S T S E E D V F E P L E P I S S L P D G E A
826    GACGGTTTTGATATAGAAGAATTATTGAGATTGATGGAAGCCGACCCAATTGAAGTCGAGCTGGTCACTGGGGGC
255    D G F D I E E L L R L M E A D P I E V E L V T G G
901    TCCTGGAATGGTGGAGCCAACACTGGCGTGGAGATGGGCCAGCAGGAACCTCTCTACCTGGATGGCTGGACCAA
280    S W N G G A N T G V E M G Q Q E P L Y L D G L D Q
976    GGCATGCTGGAGGCATGCTGCAGTCTGATTATCCTTACCCAATGTGGATATCAGAGGATCGGGCCATGCACAAC
305    G M L E G M L Q S D Y P Y P M W I S E D R A M H N
1051   TCTGCCTTCCATGATGCTGAGATGAGCGAGTTCTTCAAGGGTTGTGATCCCTACCGGCG
330    S A F H D A E M S E F F E G L

```

**Figure S1 The sequences of wheat *DREB* genes.** (a), (b) and (c) represent the nucleotide sequence and amino acid sequence of *DREB2*, *DREB6* and *Wdreb2*, respectively. The box and underline denote nuclear localization signal and AP2/EREBP domain, respectively.

(a)

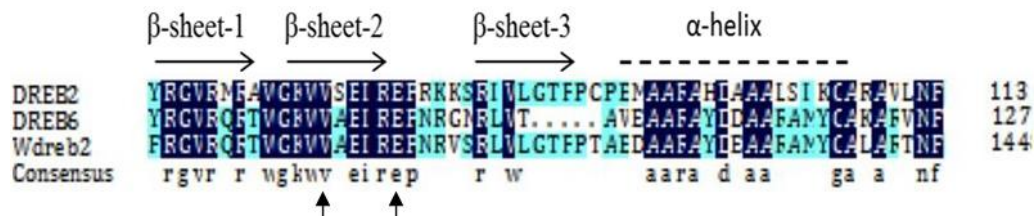

(b)

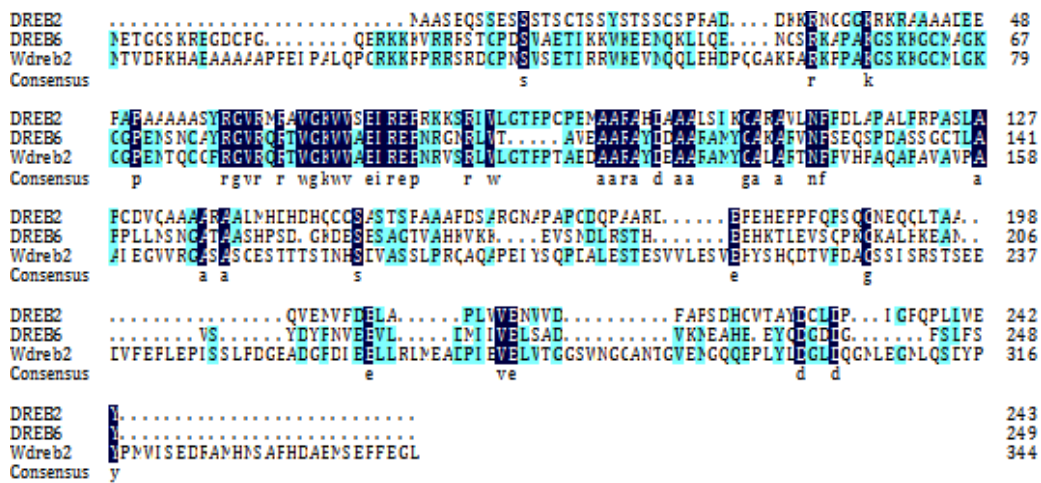

**Figure S2 Alignments of wheat DREBs.** (a) and (b) represent the alignments of AP2/EREBP domain and amino acid sequence of *DREB2*, *DREB6* and *Wdreb2*. The similar and consistent amino acids are indicated in blue or dark blue, respectively. β-sheet and α-helix are indicated with long arrow and dotted line, the conserved residues at 14 th and 19 th are marked with short arrow.

(a)

|                                  |                                                                                    |     |
|----------------------------------|------------------------------------------------------------------------------------|-----|
| DREB2                            | MAASEQSSSS...TSCTSSYSTSSCSPR.....ADDKKRNGGKKRRAAAADEEPAPAAAA.ASYRGVRLM             | 63  |
| Aegilops tauschii ERF            | MAASEQSSSS...TSCTSSYSTSSCSPR.....ADDKKQNGGNKRRAAAADEEPAPAAASASAYRGVRLM             | 64  |
| Brachypodium distachyon ERF      | MAASEQSSDSNSTTTTSSSCSASSCSPRSTADADADAAGI QNKPTQHGDNKRKRARVEASASAN...YRGVRLM        | 76  |
| Dichanthelium oligosanthes DREB3 | ..MSDLSSDTSS..TSSYSSTPSSTSSP.....KSGRGGGKSKRPRAHDDGGDGAGVPA...YRGVRLM              | 56  |
| Oryza sativa TINY                | MAASEQSSSS...TASTS.....SCG.....KKQQVAGKKREDVGGGGEQAAAVA...YRGVRLM                  | 51  |
| Setaria italica ERF              | MAASEQSSSS...TASTS.....SCG.....KKQQVAGKKREDVGGGGEQAAAVA...YRGVRLM                  | 51  |
| Sorghum bicolor TINY             | MAMSELSSDTSS..TSSYSSTDPSTSTSPR.....AAAPCSAAAVSG.KKRPRSN.GGGESGSAP..AYRGVRLM        | 63  |
| Zea mays TINY                    | MAMSEPSSDTSC..TSSCSGPSTSTSPR.....AAPSAAAAAASGGGKKRPRSDGGSSSSSAP..AYRGVRLM          | 65  |
| Domain                           |                                                                                    |     |
| DREB2                            | RAVGKWSIEI REPRKKSRI VLGTFFCPEMAARAHDAALSI KGARAVLNFPDLAPALPRPASLAPCDVQAAAAARAALMH | 142 |
| Aegilops tauschii ERF            | RAVGKWSIEI REPRKKSRI VLGTFFCPEMAARAHDAALSI KGARAVLNFPDLAPALPRPASLAPCDVQAAAAARAALMH | 143 |
| Brachypodium distachyon ERF      | RAVGKWSIEI REPRKKSRI VLGTFFCPEMAARAHDAALCVKGARAVLNFPDLAHALPRPASLAPRDVQAAAAARAALMH  | 155 |
| Dichanthelium oligosanthes DREB3 | RAVGKWSIEI REPRKKSRI VLGTFFCPEMAARAHDAALSI KGARAVLNFPDLAPALPRPASLAPRDVQAAAAARAALMQ | 135 |
| Oryza sativa TINY                | RAVGKWSIEI REPRKKSRI VLGTFFCPEMAARAHDAALSI KGARAVLNFPDLAPALPRPASLAPRDVQAAAAARAALMH | 130 |
| Setaria italica ERF              | RAVGKWSIEI REPRKKSRI VLGTFFCPEMAARAHDAALSI KGARAVLNFPDLAPALPRPASLAPRDVQAAAAARAALMH | 130 |
| Sorghum bicolor TINY             | RAVGKWSIEI REPRKKSRI VLGTFFCPEMAARAHDAALSI KGARAVLNFPDLARHLPRPASLAPRDVQAAAAARAALMH | 142 |
| Zea mays TINY                    | RAVGKWSIEI REPRKKSRI VLGTFFCPEMAARAHDAALSVKGARAVLNFPGLARHLPRPASLAPRDVQAAAAARAALMH  | 144 |
| Domain                           |                                                                                    |     |
| DREB2                            | DHDHQC...CSASTS.P.....AAAPDSARGNAPAPC.....DQPAARDEPEHEPPFQPSQGNEQQLTAAQVEMV        | 203 |
| Aegilops tauschii ERF            | DHDHQC...CSASTS.P.....AAAPASPRGNTAPC.....GQPAARDEPEHQPPFQPSQGNEQQLTAAQVEMV         | 204 |
| Brachypodium distachyon ERF      | PERAEE...GAIDDD.....DAPLAGGGEPSPP.....SPETKENEPSRGS...EETAEEAEAEQ...ELV            | 208 |
| Dichanthelium oligosanthes DREB3 | QQQKQSSSGGTASSSPDTPAAVAAAAAADDQAQRP.....DAPAHHHHEREPEPSRDQEREPQVEVA...ELV          | 205 |
| Oryza sativa TINY                | HHKHPS...SSTSTSSP.....PAAPPPDEHHPREHEP.....QQPESSREDQDQQQ.QPAAAAAAQMAVA...ELV      | 188 |
| Setaria italica ERF              | HHKHPS...SSTSTSSP.....PAAPPPDEHHPREHEP.....QQPESSREDQDQQQ.QPAAAAAAQMAVA...ELV      | 188 |
| Sorghum bicolor TINY             | MHSDG..AGSGSGSGSSS...PSSSSSSSTRDAADT.....DGAAAHDEPEPEPE.PQRQHERQPVEMA.AELV         | 205 |
| Zea mays TINY                    | HSSAGCCCCGGGGGGST...TATSSSSSSAAADVGGCQRRDGAHAHDEPEPE.....RQPLEVA.AELV              | 208 |
| Domain                           |                                                                                    |     |
| DREB2                            | FDELAPLWVENNVDF..PSDH..CWT.AYDCL..DPIGF..QPLLWEY.                                  | 243 |
| Aegilops tauschii ERF            | FDELAPLWVEDVVDFA..PSDH..CWT.AYDCL..DPIGF..QPLLWEY.                                 | 244 |
| Brachypodium distachyon ERF      | FDELAPLWVEDVVDFA..PSDH..CWTAAAYDALGLDPVGF..QPLLWEY.                                | 251 |
| Dichanthelium oligosanthes DREB3 | FDELAPLWVEDVVEFE..PSDH..SWT.PYDGF..DAVGF..QPLLWEY.                                 | 245 |
| Oryza sativa TINY                | FDELAPLWVEDVVEFG..TSDH..CWT.AYDAL..DPIGF..QPLLWEY.                                 | 228 |
| Setaria italica ERF              | FDELAPLWVEDVVEFG..TSDH..CWT.AYDAL..DPIGF..QPLLWEY.                                 | 228 |
| Sorghum bicolor TINY             | FDELAPLWVEDVVEFGGPPSDH..TWT.PCDGLD.AAVGFLHPLPLLMDY.                                | 251 |
| Zea mays TINY                    | FDELAPLWVEDVVEELG..PSADHPWPWT.PCDGLD.IAAGF..HPLPLLMDY                              | 255 |

(b)

|                               |                     |          |        |       |       |       |       |       |       |       |         |       |       |       |      |       |       |       |       |        |     |
|-------------------------------|---------------------|----------|--------|-------|-------|-------|-------|-------|-------|-------|---------|-------|-------|-------|------|-------|-------|-------|-------|--------|-----|
| DREB6                         | METGGS KREGDCPGQER. | KKKVRRRS | TGPD   | VAETI | KKWKE | ENQKL | LQENG | SRKAP | AKGS  | KKGC  | MAGKGGP | ENS   | NCAYR | 78    |      |       |       |       |       |        |     |
| Aegilops biuncialis DREB2     | METGGS KREGDCPGQER. | KKKVRRRS | TGPD   | VAETI | KKWKE | ENQKL | QENG  | SRKAP | AKGS  | KKGC  | MAGKGGP | ENS   | NCAYR | 78    |      |       |       |       |       |        |     |
| Agropyron mongolocum AP2EREBP | METGGS KREGDCPGQER. | KKKVRRRS | TGPD   | VAETI | KKWKE | ENQKL | QENG  | SRKAP | AKGS  | KKGC  | MAGKGGP | ENS   | NCAYR | 78    |      |       |       |       |       |        |     |
| Dasyphyrum villosum DREB      | .....               | KKKVRRRS | TGPD   | VAETI | KKWKE | ENQKL | QENG  | SRKAP | AKGS  | KKGC  | MAGKGGP | ENS   | NCAYR | 61    |      |       |       |       |       |        |     |
| Leymus multicaulis DREB2      | ..... MS R.         | KKKVRRRS | TGPD   | VAETI | KKWKE | ENQKL | QENG  | SRKAP | AKGS  | KKGC  | MAGKGGP | ENS   | NCAYR | 64    |      |       |       |       |       |        |     |
| Thinopyrum bessarabicum DREB  | METGGS KREGDCPGQER  | KKKVRRRS | TGPD   | VAETI | KKWKE | ENQKL | QENG  | SRKAP | AKGS  | KKGC  | MAGKGGP | ENS   | NCAYR | 79    |      |       |       |       |       |        |     |
| Thinopyrum elongatum AP2EREBP | METGGS KREGDCPGQER. | KKKVRRRS | TGPD   | VAETI | KKWKE | ENQKL | QENG  | SRKAP | AKGS  | KKGC  | MAGKGGP | ENS   | NCAYR | 78    |      |       |       |       |       |        |     |
| Triticum aestivum DREBW73     | METGGS KREGDCPGQER. | KKKVRRRS | TGPD   | VAETI | KKWKE | ENQKL | QENG  | SRKAP | AKGS  | KKGC  | MAGKGGP | ENS   | NCAYR | 78    |      |       |       |       |       |        |     |
| Domain                        |                     |          |        |       |       |       |       |       |       |       |         |       |       |       |      |       |       |       |       |        |     |
| DREB6                         | GVRQRTMGKWVAEI      | REP      | NRGNRL | WT.   | ....  | AVE   | AARAY | DDA   | ARAMY | GA    | KAR     | VNFSE | EQSPD | ASS   | GCT  | LAPPL | LMS   | NGAT  | A     | 152    |     |
| Aegilops biuncialis DREB2     | GVRQRTMGKWVAEI      | REP      | NRGNRL | VLGS  | FPT   | AVE   | AARAY | DDA   | ARAMY | GA    | KAR     | VNFSE | EQSPD | ANS   | GCT  | LAPPL | PMS   | NGAT  | A     | 157    |     |
| Agropyron mongolocum AP2EREBP | GVRQRTMGKWVAEI      | REP      | NRGNRL | VLGS  | FPT   | AVE   | AARAY | DDA   | ARAMY | GA    | KAR     | VNFSE | EQSPD | ANS   | GCT  | LAS   | PL    | LMS   | NGAT  | S      | 157 |
| Dasyphyrum villosum DREB      | GVRQRTMGKWVAEI      | REP      | NRGNRL | VLGS  | FPT   | AVE   | AARAY | DDA   | ARAMY | GA    | KAR     | VNFSE | EQSPD | ANS   | GCT  | LAPPL | V     | LMS   | NGAT  | A      | 140 |
| Leymus multicaulis DREB2      | GVRQRTMGKWVAEI      | REP      | NRGNRL | VLGS  | FPT   | AVE   | AARAY | DDA   | ARAMY | GA    | KAR     | VNFSE | EQSPD | ANS   | GCT  | ..... | ..... | ..... | ..... | .....  | 136 |
| Thinopyrum bessarabicum DREB  | GVRHRTMGKWVAEI      | REP      | NRGNRL | VLGS  | FPT   | AVE   | AARAY | DDA   | ARAMY | GA    | KAR     | ..... | ..... | ANS   | GCT  | LAPPL | P     | LMS   | NGAT  | A      | 149 |
| Thinopyrum elongatum AP2EREBP | GVRQRTMGKWVAEI      | REP      | NRGNRL | VLGS  | FPT   | AVE   | AARAY | DDA   | ARAMY | GA    | KAR     | ..... | ..... | PD    | ASS  | GCT   | LAPPL | LL    | NGAT  | A      | 151 |
| Triticum aestivum DREBW73     | GVRQRTMGKWVAEI      | REP      | NRGNRL | VLGS  | FPT   | AVE   | AARAY | DDA   | ..... | ..... | KAR     | VNFSE | EQSPD | ANS   | GCT  | LAPPL | LL    | NGAT  | A     | 151    |     |
| Domain                        |                     |          |        |       |       |       |       |       |       |       |         |       |       |       |      |       |       |       |       |        |     |
| DREB6                         | ASHPS               | DGKDES   | E.     | ..... | ..... | ..... | ..... | ..... | ..... | ..... | SAGT    | VAHKV | KKEVS | NDLRS | THEE | HKTL  | LEVS  | QPKG  | KALH  | HKEANV | 207 |
| Aegilops biuncialis DREB2     | ASHPS               | DGKDES   | ESPPS  | LI    | S     | DAPT  | APL   | HRS   | DAK   | GESE  | SAGT    | VAHKV | KKEVS | NDLRS | THEE | HKTL  | LEVS  | QPKG  | KALH  | HKEANV | 236 |
| Agropyron mongolocum AP2EREBP | ASHPS               | DGKDES   | ESPPS  | LI    | S     | NAPTA | ..... | ..... | ..... | AQSE  | SAGT    | VAHKV | KKEVS | NDLRS | THEE | HKTL  | LEVS  | QPKG  | KALH  | HKEANV | 228 |
| Dasyphyrum villosum DREB      | ASHPS               | DGKDES   | ESPPS  | LI    | S     | NAPTA | AL    | HRS   | DAK   | DESE  | SAGT    | VAHKV | KKEVS | NDLRS | THEE | HKTL  | LEVS  | QPKG  | KALH  | HREANV | 219 |
| Leymus multicaulis DREB2      | ASHPS               | DGKDES   | ESPP   | LI    | S     | NAPTA | AL    | HQS   | DAK   | DESE  | SAGT    | VAHKV | KKEVS | NDLRS | THEE | HKTL  | LEVS  | QPKG  | KALH  | HKEANV | 215 |
| Thinopyrum bessarabicum DREB  | VSHPS               | DGKDES   | GSPPS  | LI    | S     | NAPTA | AL    | HRS   | DAK   | DESE  | SAGT    | VAHKV | KKEVS | NDLRS | THEE | HKTP  | EV    | QPKG  | KALH  | HKEANV | 228 |
| Thinopyrum elongatum AP2EREBP | ASHPS               | DGKDES   | ESPPS  | LI    | S     | NAP   | AAAL  | HRS   | DAK   | DESE  | SAGT    | VAHKV | KKEVS | NDLRS | THEE | HKTL  | LEVS  | QPKG  | KALH  | HKEANV | 230 |
| Triticum aestivum DREBW73     | ASHPS               | DGKDES   | ESPPS  | LI    | S     | NGPT  | AAAL  | RRS   | DAK   | DESE  | SAGT    | VAHKV | KKEVS | NDLRS | THEE | HKTL  | LEVS  | QPKG  | KALH  | HKEANV | 230 |
| Domain                        |                     |          |        |       |       |       |       |       |       |       |         |       |       |       |      |       |       |       |       |        |     |
| DREB6                         | SYDY                | FNVEE    | VLD    | MI    | I     | V     | ELS   | ADV   | KME   | AHEEY | QD      | GDD   | GFS   | LFSY  |      |       |       |       |       |        | 249 |
| Aegilops biuncialis DREB2     | SYDY                | FNVEE    | VLD    | MI    | I     | V     | ELS   | ADV   | KTE   | AHEEY | QD      | GDD   | GFS   | LFSY  |      |       |       |       |       |        | 278 |
| Agropyron mongolocum AP2EREBP | SYDY                | FNVEE    | VLD    | MI    | I     | V     | ELS   | ADV   | KME   | AHEEY | QD      | GDD   | GFS   | LFSY  |      |       |       |       |       |        | 270 |
| Dasyphyrum villosum DREB      | SYDY                | FNVEE    | VLD    | MI    | I     | V     | ELS   | ADV   | KME   | AHEEY | QD      | GDD   | GFS   | LFSY  |      |       |       |       |       |        | 261 |
| Leymus multicaulis DREB2      | SYDY                | FNVEE    | VLD    | MI    | I     | V     | ELS   | ADV   | KME   | AHEEY | QD      | GDD   | GFS   | LFSY  |      |       |       |       |       |        | 257 |
| Thinopyrum bessarabicum DREB  | SYNY                | FNVEE    | VLD    | MI    | I     | M     | ELS   | ADV   | KME   | AHEEY | QD      | GDD   | GFS   | LFSY  |      |       |       |       |       |        | 270 |
| Thinopyrum elongatum AP2EREBP | SYDH                | FNVEE    | VLD    | MI    | I     | V     | ELS   | ADV   | KME   | AHEEY | QD      | GDD   | GFS   | LFSY  |      |       |       |       |       |        | 272 |
| Triticum aestivum DREBW73     | SYDY                | FNVEE    | VLD    | MI    | I     | V     | ELS   | ADV   | KME   | AHEEY | QD      | GDD   | GFS   | LFSY  |      |       |       |       |       |        | 272 |

(c)

|                           |                                                                                                 |     |
|---------------------------|-------------------------------------------------------------------------------------------------|-----|
| Wdreb2                    | MTVDRKHAEEAAAAA. . . . . PFEI PALQ. PG. . . . . RKKRPRRS RDGPN SVSETI RRWKEV NQQL EHPD QGAKR    | 62  |
| Aegilops speltoides DREB1 | MTVDRKDAEAAAAAP. . . . . FEI PALQ. PG. . . . . RKKRPRRS RDGPN SVSETI RRWKEV NQQL EHPD QGAKR     | 61  |
| Aegilops tauschii DREB2B  | MTVDRKHAEEAAAAA. . . . . PFEI PALQ. PG. . . . . RKKRPRRS RDGPN SVSETI RRWKEV NQQL EHPD QGAKR    | 62  |
| Triticum aestivum DREB4B  | MTVDRKDAEAAAAA. . . . . TPFEI PALQ. PG. . . . . RKKRPRRS RDGPN SVSETI RRWKEV NQQL EHPD QGAKR    | 64  |
| Triticum aestivum DREB5B  | MTVDRKDAEAAAAA. . . . . TPFEI PALQ. PG. . . . . GKKRPRRS RDGPN SVSETI RRWKEV NQQL EHPD QGAKR    | 64  |
| Triticum dicoccoides DREB | MTVDRKDAEAAAAA. . . . . PFEI PALQ. PG. . . . . RKKRPRRS RDGPN SVSETI RRWKEV NQQL EHPD QGAKR     | 64  |
| Triticum turgidum DRF     | MTVDRKDAEAAAAA. . . . . PFEI PALQ. PG. . . . . RKKRPRRS RDGPN SVSETI RRWKEV NQQL EHPD QGAKR     | 63  |
| Triticum urartu DREB2B    | KGTSRLTLEKSAGSSNLPFCNEYAELARQNKGDALPVASI L RKKRPRRS RDGPN SVSETI RRWKEV NQQL EHPD QGAKR         | 79  |
| Domain                    |                                                                                                 |     |
| Wdreb2                    | ARKPPAKGSKKGCMLGKGGFENTQCGFRGVRQRTWGKWWAEI REPNRVSRRLWLGTFFPTAEDAARAYDEAARAMYGALAR              | 141 |
| Aegilops speltoides DREB1 | ARKPPAKGSKKGCMLGKGGFENTQCGFRGVRQRTWGKWWAEI REPNRVSRRLWLGTFFPT. . . . . AYDEAARAMYGALAR          | 134 |
| Aegilops tauschii DREB2B  | ARKPPAKGSKKGCMLGKGGFENTQCGFRGVRQRTWGKWWAEI REPNRVSRRLWLGTFFPTAEDAARAYDEAARAMYGALAR              | 141 |
| Triticum aestivum DREB4B  | ARKPPAKGSKKGCMLGKGGFENTQCGFRGVRQRTWGKWWAEI REPNRVSRRLWLGTFFPTAEDAARAYDEAARAMYGALAR              | 143 |
| Triticum aestivum DREB5B  | ARKPPAKGSKKGCMLGKGGFENTQCGFRGVRQRTWGKWWAEI REPNRVSRRLWLGTFFPTAEDAARAYDEAARAMYGALAR              | 143 |
| Triticum dicoccoides DREB | ARKPPAKGSKKGCMLGKGGFENTQCGFRGVRQRTWGKWWAEI REPNRVSRRLWLGTFFPTAEDAARAYDEAARAMYGALAR              | 143 |
| Triticum turgidum DRF     | ARKPPAKGSKKGCMLGKGGFENTQCGFRGVRQRTWGKWWAEI REPNRVSRRLWLGTFFPTAEDAARAYDEAARAMYGALAR              | 142 |
| Triticum urartu DREB2B    | ARKPPAKGSKKGCMLGKGGFENTQCGFRGVRQRTWGKWWAEI REPNRVSRRLWLGTFFPTAED. . . . . RAMYGALAR             | 149 |
| Domain                    |                                                                                                 |     |
| Wdreb2                    | TNFFVHPAQAPAVAVPAAI EGVVRGASASCESTTTTSTNHS DVAS SLPRQAQAP E I YSQPDAL ESTESVVL ESVEHY SHQ       | 220 |
| Aegilops speltoides DREB1 | TNFFVHPAQAPAVAVQAAI EGVVRGASASCESTTTTSTNHS DVAS SLPRQAQAP E I YSQPDVLESTESVVLTPVEHYNHQ          | 213 |
| Aegilops tauschii DREB2B  | TNFFVHPAQAPAVAVPAAI EGVVRGASASCESTTTTSTNHS DVAS SLPRQAQAP E I YSQPDAL ESTESVVL ESVEHY SHQ       | 220 |
| Triticum aestivum DREB4B  | TNFFVHPAQAPAVAVLPAAI EGVVRGASASCESTTTTSTNHS DVAS SLPRQAQAL E I YSQPDVLESTESVVL ESVEHY SHK       | 222 |
| Triticum aestivum DREB5B  | TNFFVHPAQAPAVAVPAAI EGVVRGASASCESTTTTSTNHS DVAS SLPRQAQAP E I YSQPDAL ESTESVVL ESVEHY SHQ       | 222 |
| Triticum dicoccoides DREB | ANFFVHPAQAPAVAVAAI EGVVRGASASCESTTTTSTNHS DVAS SLPRQAQAL E I YSQPDVLESTESVVLTPVEHY SHK          | 222 |
| Triticum turgidum DRF     | TNFFVHPAQAPAVAVLPAAI EGVVRGASASCESTTTTSTNHS DVAS SLPRQAQAL E I YSQPDVLESTESVVL ESVEHY SHK       | 221 |
| Triticum urartu DREB2B    | TNFFVHPAQAPAVAVLPAAI EGVVRGASASCESTTTTSTNHS DVAS SLPRQAQAL E I YSQPDVLESTESVVL ESVEHY SHK       | 228 |
| Domain                    |                                                                                                 |     |
| Wdreb2                    | DTVPFDAGSSI SRSITS EEDVFE PLEPI SSLPDGEADGFDI EELLRLMEADPI EVELVTGGS WNGGANTGVEMGQQEPLYL        | 299 |
| Aegilops speltoides DREB1 | DNVPFDAGSSI ARSITS EEDVFE. . . . . LRLMEADPI EVELVTGGS WNGGANTGVEMGQQEPLYL                      | 271 |
| Aegilops tauschii DREB2B  | DTVPFDAGSSI SRSITS EEDVFE PLEPI SSLPDGEADGFDI EELLRLMEADPI EVELVTGGS WNGGANTGVEMGQQEPLYL        | 299 |
| Triticum aestivum DREB4B  | DTVPFDAGSSI ARSITS EEDVFE PLEPI SSLPDGEADGFDI EELLRLMEADPI EVELVTGGS WNCGTNTGVEMGLQEPLYL        | 301 |
| Triticum aestivum DREB5B  | DTVPFDAGSSI SRSITS EEDVFE PLEPI SSLPDGEADGFDI EELLRLMEADPI EVELVTGGS WNGGANTGVEMGQQEPLYL        | 301 |
| Triticum dicoccoides DREB | DSVPFDAGSSI ARSITS EEDVFE PLEPI SSLPDGES DGFDI EELLRLMEADPI EVELVTGGS WNG. . . . . VEI GQQEPLYL | 296 |
| Triticum turgidum DRF     | DTVPFDAGSSI ARSITS EEDVFE PLEPI SSLPDGEADGFDI EELLRLMEADPI EVELVTGGS WNCGTNTGVEMGLQEPLYL        | 300 |
| Triticum urartu DREB2B    | DTVPFDAGSSI ARSITS EEDVFE PLEPI SSLPDGES DGFDI E. . . . . ELL EVELVTGGS WNCGTNTGVEMGLQEPLYL     | 299 |
| Domain                    |                                                                                                 |     |
| Wdreb2                    | DGLDQGMLEGMLQS DY PYPFMMI SEDRAMHNS AFHDAEMS EFFEGL                                             | 344 |
| Aegilops speltoides DREB1 | DGLDQGMLEGML. . . . . PYPFMMI SEDRAMHNS AFHDAEMS EFFEGL                                         | 312 |
| Aegilops tauschii DREB2B  | DGLDQGMLEGMLQS DY PYPFMMI SEDRAMHNS AFHDAEMS EFFEGL                                             | 344 |
| Triticum aestivum DREB4B  | DGLDQGMLEGMLQADY PYPFMMI SEDRAMRNP AFHDAEMS EFFEGL                                              | 346 |
| Triticum aestivum DREB5B  | DGLDQGMLEGMLQS DY PYPFMMI SEDRAMHNS AFHDAEMS EFFEGL                                             | 346 |
| Triticum dicoccoides DREB | DGLDQGMLEGMLQS DY PYPFMMI SEDRAMRNP AFHDAEMS EFFEGL                                             | 341 |
| Triticum turgidum DRF     | DGLDQGMLEGMLQADY PYPFMMI SEDRAMRNP AFHDAEMS EFFEGL                                              | 345 |
| Triticum urartu DREB2B    | DGLDQGMLEGMLQADY PYPFMMI SEDRAMHNP AFHDAEMS EFFEGL                                              | 344 |

**Figure S3 Multiple alignment of wheat DREBs and its homologous sequences.** (a), (b) and (c) are the alignment on some homologous sequences of wheat DREB2, DREB6 and Wdreb2, respectively. The underline denotes the AP2/EREBP domain.

(a)

GGTCGGCAGC ACTACTATGC TCGCCTCATT GCCCTGCAAA AGCCTGAACC GCCACCCACC GATGTGATAT CGCTTCCCCG  
GCCATCCCTC TAATCCTCCT TCCCCCAACC CAAACAATAA ACCCTCTTAT TCCCTCCCGT TTTCAACGCC GTGCTCGTGG  
CTGCATTGAA ATCAATTGAT GCATCATTGT TTTTAGGTGT ATGAGCTTA ACCCAATTTT TTTACTATTT ATTATTAGGG  
AT-rich element CAAT-box TATA-box GT1-motif  
TCTGAGCAAT AACTATCTCT AAGTTCACCA CTAACCATCC TAACATGAGA CTTATACAAG TACAAAAGAC ACGACAAGAT  
CAAT-box  
CTTGATCAGA TGGTTATCAA TATCAAATGC AAAACATTTT TGGAGCCGGC CCTTTGCTGA AGATTGTTGG AACTTTGTTT  
ATCCCTGAAG AAACATAAAT CTGTTGCTCT TGAGGCCAGA TCCAAAGGAA AAGTCAAGGG TGCCTTTCTT TATGGAAATT  
GARE-motif  
ATTGTACTTG CTTCTGGGC CATCTGGATT TCCAAAAGCA ATAAGATATT CATATGAGGC GTGCAGTTTA ATGAGATGGA  
CAAT-box  
AATAAATTTG CCCCCAAGAG CTCACCCTGC TGAAATTTAG GATTAAGAGG AGACATGAAG TTGTTTTTGT CTTCAGGTCC  
GACTCCTTTT GTAAACTTTA ATCTGTAATC TTTCTTTCCT TCCTTTTTTT TTCTTCCTTA TTAGGCTTAT CTGTAGTCAT  
P-box  
TTGTTGATAT TGTTTAAATT CTTTCATTAA GAGTGAATTC TATTATTTT ACCTCTTAGT GTACAGTTG AGACATCAAC  
TATA-box G-box MBS  
TGCTATATTT AACTTCCCGC AAAAAAAGA ACTGCTATAT TTAACAGGTT TTCACATATT TACCCAATTT AAGCAAACCTG  
CAAT-box  
GTGCGACAAA TTATCCTATT TTTTCTCTT TAAATGTTGA TTGTACATGC CATTTTGGCT GTTTTTTTTA CTTTTTATTT  
TATA-box TATA-box  
GCTCTTGATT TGTCAGGGA TGGGTCTAC CTGCCAGTTG GGGAGCAAGA AATATGAGTG AAAAATTGGA GTACGGCTGT  
AGTTTGAACC CGAAATCTCC CCCCAGCAGC AGGTAAGACT CATCCCCGC CGGACCGAGA GCAAACCAGA CAAAACCAAA  
LTR GC-motif TCA-motif GC-motif ARE ARE  
CAGTAAACA AACCAGCCAA TATGGCATGC ACAGTCAACA CTGATTCAGA AAATAAATAA ATAAATGGGG ATAATTTGTG  
ARE  
GCACAAATTT GCTTACATTG GGTAAAAGTA CATGGAAAA CTACCAAATG GGACAATTCT TGTACAAAC GTGAAACGTG  
CAAT-box CAAT-box ABRE ABRE  
GGGTACAAAT AGAATTAACC CTGATGTAAT TCCATTTGTA CATTTTCCTC TGACAATTAT TGAAAAAGTA GAGTTACAGT  
GT1-motif CAAT-box  
AGGGTTTAC CTTACTATTT TTCTCAAAA AAAAGAATTC ACTCTTAAAT TAATTATATA AAATTGTAGT GGGGTATTAT  
TATA-box  
CCTACCGTTG CCCTTCAAAA GAAAAATGTC GAGTGAGAAA TAATTATTT TAATTGACC GTGCTATAGA CGTTTTATTT  
CCAAT-box TATA-box  
TCTAAGACAA CATATACTGC GTTCTGAAAT GTCAGGGAGT CCAAGTGAAT CGTTGGGAGG AATTGAATGT CTAGGTGTAG  
CAGGGCATGG AGTCAGGAGA GGGAGGCATG CAGCCCCGCC CGGTCTGTGC CGACCCTGCG AGAGACCATG CGACCCTAAT  
TATTGATGAT CATGGCGGAG TCAGCTGTG TTTATGGGT CCTATCCCAC GCACAGTTG CTCCACTCTC CTCTACATAT  
TGA-element GATA-motif TATC-box G-box  
ACAGCACCAC CTCCCTCTC CTCTCGCTC TACCCTCTC CTGCTCGCA GTAACCTGAG TCCTACTCCC TGCACGGTCC  
TCCCATTACC ACGAGCGAGC GCGTGTATC TCATACGGGC ACGCGGGGCT ACGTGGTGCT CTCTGCGCGC ACATG  
Sp1 Skn-1-motif ABRE

ITCCCCCACTA GAAGCATAAC TTATGTCATCT GCACCTATGAG TGGACGGGGA AATAGATGCT TAGTGGTGGC AGTGTTTTGA  
 A-box  
 ACCTCTTTAG CGGAATATGT TGTGTGCATC GTTTTGCTTC TGTCTGCT TCAGTTACAA ATGGTTCTCT TTGAAGGCCA  
 TGA-element  
 GACATATCCA TCTGACACAA ACCGTGTGAT GATATAACGA AGTTCCAATT CACGATGTGA AGTGCTCATG TGATGTATTT  
 CAAT-box  
 CTATATTAGG TGATCCCACA TGAGCATCGA GAAACTCAA GATCTTAAAT TGCCAAAAA CGGTCATATC TTTTATGTCC  
 TATA-box MBSI TATA-box  
 TCGCAAGGAG ATGCCATAATT TCATCATGAA CCCACTCTGG CCATGGCACC AATACTAATC ATGCCAAGAT AGATCGTCCG  
 CAAT-box  
 AACACTATAC CTACGTACAC TTACATCTAC CATGAGACCT CAAACAAGAG CCTCACGTGT CATGCACCAC TGGATATCAG  
 G-box ABRE  
 ACGAAAGCCT TAGTGCATAT CTCTTGACAA CAAGACAAT GATGCCGATG TTGTGTCCAT TCCCAATGTC ACCTTTTTTC  
 MBS CAAT-box  
 GCGCCGTCTC CTCACGACGA GAAGAGGATA CAGGTCTGTT TGGATGACGC TGACAACGCC CCCGCAAAA ATGGATGTGC  
 SP1  
 CAATAATTTC AAGGAGGAAT TCAGATCCTT GTTTCGCCA ACACGTAGTG TGTAGAAATT GAACCGACGA TCGAAAAGTT  
 GARE-motif CGTCA-motif GC-motif  
 CAAT-box ACE ABRE  
 GGTGGAGGTT CAAACGTTTC CCCATGCTCC CGGTCCATGC TGAAAAAATG GTGTGGAGAG ACCTGATTTT CACAAGCCCC  
 AuxRR-core  
 CTTTGACCAT GGTACCAGCC ATGCCAAGAT AGATCGTCCG AACACTATAC CCATGCAGTC GAGCTACATG CACTTGTCTG  
 W-box  
 TTTCGATTGT TCAGTGGCTC TTTCTAAGAG GCGGGGAATG TAAATAGAAA ACATCCCACG AGGAAGGAAT CAAGTGGGAC  
 CGAGAGATCA TTGCTCATTC GGTGGTTGCC CTCCCCCCTT AATAAGTAAT CCTCTGCAA AGTAATATAA GAGCGTTTAG  
 ATCACTATAA AAGGGAGTAC CTATCAAGAA TTGGGCCAGT TAGTATTTTC ATAGAAAAA AATACCCTTT CCAGGTTTAA  
 Box-E MBS  
 TGATCAAACA TCATCTAGAT AATGACAACG TACCGAGTAG GCCCTACATC TATCGGGGAG CTCACATCCT CACAAGAGCG  
 Skn-1 motif ABRE  
 AGGCACATAC TCTCGTGTCT ATATCACGAG ATCTCGAACA AGAGCCATGT GTGACGTCTA CCGTGGGGTC TCAAACGGCA  
 TGACG-motif  
 ACCCCGCGTG TCTATCTGTT GACATCAAGA CACTGCGCCG CGATGCTCTT GTCCATTTTC AACGTCACTT TTTCCCGCCC  
 MBS CGTCA-motif  
 GCCTTCCCTC GCGGGGAAGA AAGATACGTG TCTATTGGGA GCGGCGCCA CGCCAACCCC ACAAACTCGG GCGCGCCAAT  
 ABRE  
 AATTTGACGA AGGAATTTAC ATCATCGGTT TCACCGACAC ACGTGGCGTA AAAGCTGAAC CAACTACTGA AAAGTCGGCG  
 ABRE  
 GAGGTCCACG TGCACCGATG CCGAAAATTG ATAGGGCAGC TCCAGACAGC ATTCCAAACA AACCTACAT AGTGGAACA  
 LTR  
 TCACACGAAA AATGTTGAGA TCAGCCTCTC CCGCTCCCTC TTTTCATCAA AAGGAAAACG GCGGAAACGA AA TTTGAAAT  
 ERE  
 CGGCGCCCGA CGGTGATACT CCTATATCGC AGCGAATCCA GGGGGGATCG AGTCGGCGTG TCCGTCCGTT TGGAAGGCTG  
 CRT/DRE SP1 A-box  
 CTTGCAAGCA GGTACGACT TGCTTTACT GG

ATCCGTTAC ATGGACAGCG GCGAGCCTT AGTTTGTC GAAGCATTAT GCCACGTTT TCATCCGTTT TAATTCAAAC  
MRE  
AGACACACTA GAATCAAAAT GCATCGACAC GTTGAGTTA CCCTTACAAT GGAGAAGAGA AGACCACGCC GGCCACCCTA  
ABRE CAAT-box  
GATCCATGCA ACCAAAGGCG TCTCACGCCG TCTCAAGAAT AAAAAATGCC TCACGATCCA CCGTGTCATC CCGACTGCC  
O2-site  
ACGTGTCGTC TCCTATATCG ACTCAGCCCC CAGCCACTGG CCACATGTAG ACGTACACGT GGAACCCACC CAACAGCAGC  
ABRE TATA-box CAT-box ABRE  
ACGTCCAATC CACC CCGAAA GAAAAGCACC GGTAGCACTC GAAAGCGTAA AGGAGAAGCC GAGTTTCCTT CGGCACCAAG  
CAAT-box LTR  
TCTCGGGAAG TTCCCCGCA CCACGGCACA GCTGACGTCA CGCGTCCGCA GCCTCACCCC CACGCACCAG GCCCAGCGG  
TGACG-motif  
ACCGCGTCGC TTACATCCGG GCCCCACGCG CCAACGCCCC GCACGCGAGT GACCTAGATA ATTCCGTGAG TCCGGAGCAC  
GGAGACCCC GATCCGGGCT ATAATAGGCG CCCC GGCGTG AGCCCTGGG GTTTCGACT TTCTTTCTCT CTTCCTCAA  
TATA-box  
CTCTCTATCC AAGTCGACG AGCGAAGAAA CAGGCGACAA GATTGCGAAC GCTAGATATC TGGACCCGAT CCGGATCGGG  
CAAT-box  
TCGGCCATC

**Figure S4 Promoter regions of wheat *DREB* genes.** (a), (b) and (c) represent the promoter sequences and some *cis*-acting elements of *DREB2*, *DREB6* and *Wdreb2*, respectively.

(a)

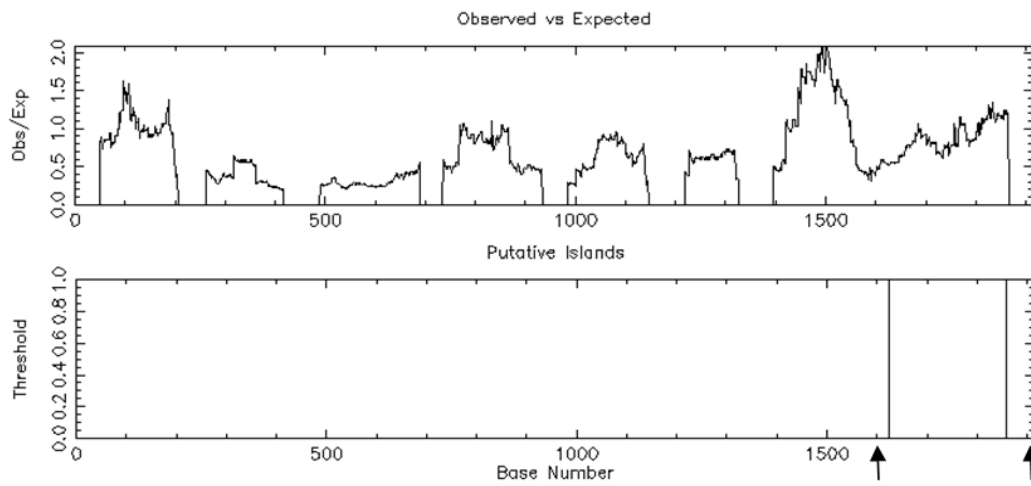

(b)

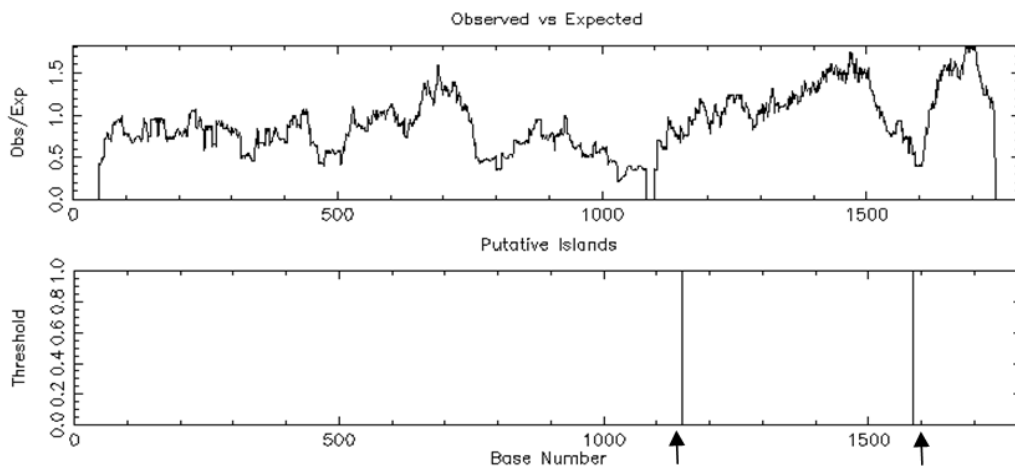

(c)

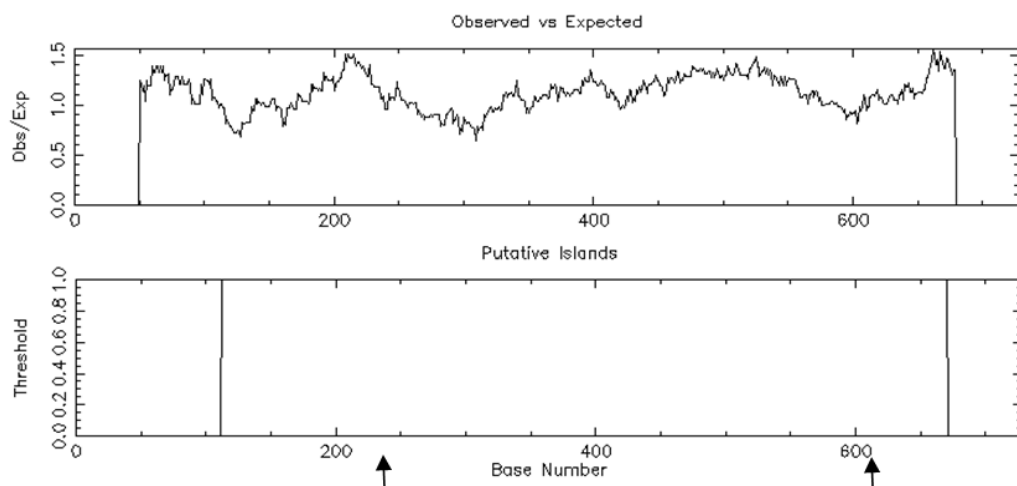

**Figure S5 Prediction of CpG islands in the promoter regions of wheat *DREB* genes.** (a), (b) and (c) represent the location of putative CpG islands in the promoter regions of *DREB2*, *DREB6* and *Wdreb2*, respectively. The CpG island regions between two arrows below each diagram were examined using BSP, respectively.

(a)

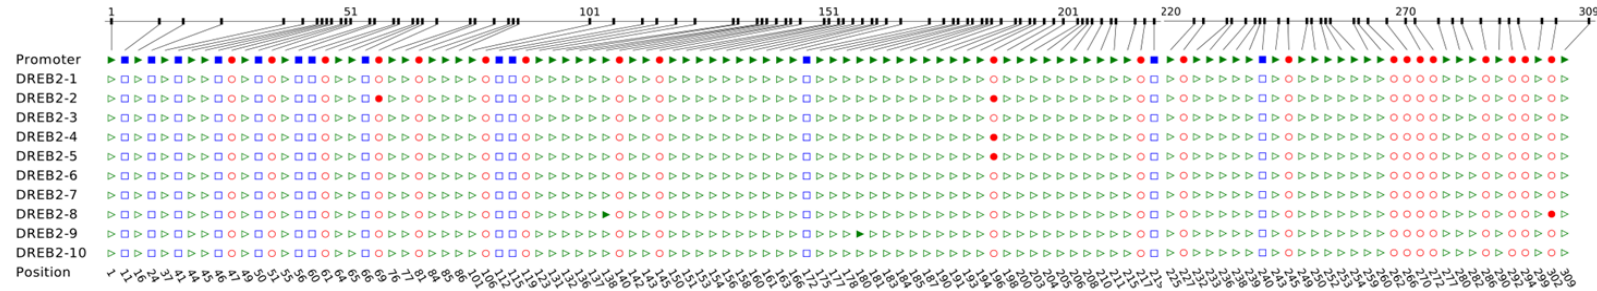

(b)

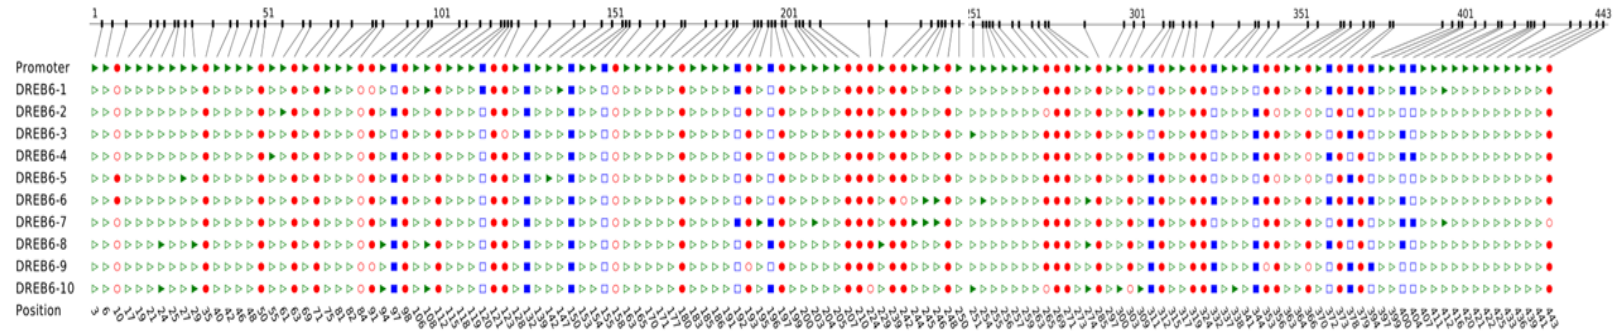

(c)

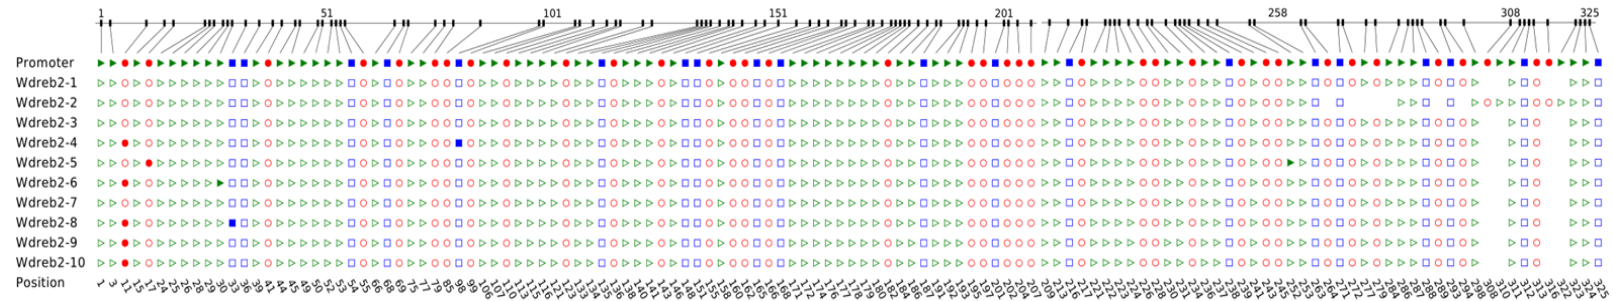

**Figure S6 Bisulfite sequencing analysis on the promoter regions of wheat *DREB* genes using CyMATE.** (a), (b) and (c) indicate methylation sites in the promoter regions of *DREB2*, *DREB6* and *Wdreb2* in wheat leaves. Circles, squares and triangles represent CG, CHG or CHH, filled and hollow circles denote methylated and unmethylated cytosine. Each row represents the sequencing result of one positive clone. The length of CpG island sequence is visualized above each diagram and the potential methylation sites are displayed below.

**Table S1 Homologous amino acid sequences of wheat DREBs by BLASP**

|        | Protein                                 | Accession Number | Identity |
|--------|-----------------------------------------|------------------|----------|
| DREB2  | <i>Aegilops tauschii</i> ERF            | XP-020183719.1   | 95%      |
|        | <i>Setaria italica</i> ERF              | XP-004968548.2   | 66%      |
|        | <i>Oryza sativa</i> TINY                | XP-015644400.1   | 64%      |
|        | <i>Brachypodium distachyon</i> ERF      | XP-010233006.1   | 64%      |
|        | <i>Dichanthelium oligosanthes</i> DREB3 | OEL19602.1       | 61%      |
|        | <i>Sorghum bicolor</i> TINY             | XP-002454993.1   | 61%      |
|        | <i>Zea mays</i> TINY                    | XP-020398183.1   | 59%      |
| DREB6  | <i>Thinopyrum elongatum</i> AP2/EREBP   | AEI98920.1       | 98%      |
|        | <i>Triticum aestivum</i> DREBW73        | AAAY44604.1      | 98%      |
|        | <i>Agropyron mongolocum</i> AP2/EREBP   | AJD80690.1       | 94%      |
|        | <i>Aegilops biuncialis</i> DREB2        | CBX87024.1       | 97%      |
|        | <i>Leymus multicaulis</i> DREB2         | AFO12475.1       | 97%      |
|        | <i>Thinopyrum bessarabicum</i> DREB     | AIY22662.1       | 96%      |
|        | <i>Dasypyrum villosum</i> DREB          | AIY22669.1       | 97%      |
| Wdreb2 | <i>Aegilops tauschii</i> DREB2B         | XP-020156298.1   | 99%      |
|        | <i>Triticum aestivum</i> DREB5B         | AAX13287.1       | 99%      |
|        | <i>Aegilops speltoides</i> DREB1        | AC035588.1       | 96%      |
|        | <i>Triticum turgidum</i> DRF            | AFO10996.1       | 95%      |
|        | <i>Triticum aestivum</i> DREB4B         | AAX13283.1       | 94%      |
|        | <i>Triticum dicoccoides</i> DREB        | ADM93284.1       | 93%      |
|        | <i>Triticum urartu</i> DREB2B           | EMS45041.1       | 93%      |

The homologous sequences of wheat DREB2, DREB6 and Wdreb2 were retrieved with BlastP algorithm, which are mainly from some species in Gramineae. The homologous sequences having higher identity with wheat DREBs were selected from some Genera in Gramineae, and were further analyzed.

**Table S2 The *cis*-acting elements in the promoter of *DREB2***

| Element      | Sequence         | Function                                                                      | Number |
|--------------|------------------|-------------------------------------------------------------------------------|--------|
| TATA-box     | TATAAW           | Core promoter element around -30 of transcription start                       | 13     |
| CAAT-box     | CAAT             | Common <i>cis</i> -acting element in promoter and enhancer regions            | 34     |
| ABRE         | CGTACGTGCA       | <i>Cis</i> -acting element involved in the abscisic acid responsiveness       | 5      |
| ACE          | AAAACGTTTA       | <i>Cis</i> -acting element involved in light responsiveness                   | 1      |
| ARE          | TGGTTT           | <i>Cis</i> -acting regulatory element essential for the anaerobic induction   | 3      |
| MBS          | CAACTG           | MYB binding site involved in drought-inducibility                             | 2      |
| LTR          | CCGAAA           | <i>Cis</i> -acting element involved in low-temperature responsiveness         | 1      |
| G-box        | (T/C)ACGT(C/G/T) | <i>Cis</i> -acting regulatory element involved in light responsiveness        | 6      |
| C-repeat/DRE | TGGCCGAC         | Regulatory element involved in cold- and dehydration-responsiveness           | 1      |
| EIER         | TTCGACC          | Elicitor responsive element                                                   | 1      |
| TGACG-motif  | TGACG            | <i>Cis</i> -acting regulatory element involved in the MeJA-responsiveness     | 1      |
| Skn-1-motif  | GTCAT            | <i>Cis</i> -acting regulatory element required for endosperm expression       | 1      |
| SP1          | CC(G/A)CCC       | Light responsive element                                                      | 4      |
| GARE-motif   | TCTGTTG          | Gibberellin responsive element                                                | 1      |
| TCA-element  | TCAGAAGAGG       | <i>Cis</i> -acting element involved in salicylic acid responsiveness          | 2      |
| TGA-element  | AACGAC           | Auxin responsive element                                                      | 1      |
| OCT          | CGCGGATC         | <i>Cis</i> -acting regulatory element related to meristem specific activation | 1      |
| TATC-box     | TATCCCA          | <i>Cis</i> -acting element involved in gibberellins responsiveness            | 1      |
| Circadian    | CAANNNNATC       | <i>Cis</i> -acting regulatory element involved in circadian control           | 1      |
| MNF          | GTGCCC(A/T)      | Light responsive element                                                      | 1      |
| HD-Zip       | CAAT(A/T)ATTG    | Element involved in differentiation of the palisade mesophyll cells           | 1      |
| GT1-motif    | GGTTAAT          | Light responsive element                                                      | 2      |
| GC-motif     | CCCCCG           | Enhancer-like element involved in anoxic specific inducibility                | 2      |
| TATC-box     | TATCCCA          | <i>Cis</i> -acting element involved in gibberellins responsiveness            | 1      |
| P-box        | CCTTTTG          | Gibberellins responsive element                                               | 1      |

**Table S3 The *cis*-acting elements in the promoter of *DREB6***

| Element     | Sequence        | Function                                                                    | Number |
|-------------|-----------------|-----------------------------------------------------------------------------|--------|
| TATA-box    | TATAAW          | Core promoter element around -30 of transcription start                     | 10     |
| CAAT-box    | CAAT            | Common <i>cis</i> -acting element in promoter and enhancer regions          | 19     |
| ABRE        | CGTACGTGCA      | <i>Cis</i> -acting element involved in the abscisic acid responsiveness     | 10     |
| ACE         | AAAACGTTTA      | <i>Cis</i> -acting element involved in light responsiveness                 | 2      |
| ARE         | TGGTTT1         | <i>Cis</i> -acting regulatory element essential for the anaerobic induction | 1      |
| MBS         | CAACTG          | MYB binding site involved in drought-inducibility                           | 5      |
| LTR         | CCGAAA          | <i>Cis</i> -acting element involved in low-temperature responsiveness       | 1      |
| AuxRR-core  | GGTCCAT         | <i>Cis</i> -acting regulatory element involved in auxin responsiveness      | 1      |
| TGA-element | AACGAC          | Auxin responsive element                                                    | 1      |
| TGACG-motif | TGACG           | <i>Cis</i> -acting regulatory element involved in the MeJA-responsiveness   | 4      |
| CGTCA-motif | CGTCA           | <i>Cis</i> -acting regulatory element involved in the MeJA-responsiveness   | 3      |
| CAT-box     | GCCACT          | <i>Cis</i> -acting regulatory element related to meristem expression        | 2      |
| G-box       | (C/T)ACG(T/A)G  | <i>Cis</i> -acting regulatory element involved in light responsiveness      | 11     |
| MBSI        | aaAaaC(G/C)GTTA | MYB binding site involved in flavonoid biosynthetic genes regulation        | 1      |
| A-box       | CCGTCC          | <i>Cis</i> -acting regulatory element                                       | 2      |
| GARE-motif  | AAACAGA         | Gibberellin responsive element                                              | 2      |
| P-box       | CCTTTTG         | Gibberellin responsive element                                              | 1      |
| Circadian   | CAANNNNATC      | <i>Cis</i> -acting regulatory element involved in circadian control         | 1      |
| DRE/CRT     | RCCGAC          | Drought, high salt and cold-responsive element                              | 1      |
| ERE         | ATTTCAAA        | Ethylene-responsive element                                                 | 1      |
| SP1         | GGGCGG          | Light responsive element                                                    | 6      |
| Box I       | TTTCAAA         | Light responsive element                                                    | 1      |
| GC-motif    | CCCCCG          | Enhancer-like element involved in anoxic specific inducibility              | 1      |
| W-box       | TTGACC          | Fungal elicitor responsive element                                          | 1      |

**Table S4 The *cis*-acting elements in the promoter of *Wdreb2***

| Element             | Sequence     | Function                                                                       | Number |
|---------------------|--------------|--------------------------------------------------------------------------------|--------|
| 5UTRpy-rich stretch | TTTCTTCTCT   | <i>Cis</i> -acting element conferring high transcription levels                | 1      |
| TATA-box            | TATAAW       | Core promoter element around -30 of transcription start                        | 5      |
| CAAT-box            | CAAT         | Common <i>cis</i> -acting element in promoter and enhancer regions             | 4      |
| CAT-box             | GCCACT       | <i>Cis</i> -acting regulatory element related to meristem expression           | 1      |
| ABRE                | CGTACGTGCA   | <i>Cis</i> -acting element involved in the abscisic acid responsiveness        | 8      |
| ACE                 | AAAACGTTTA   | <i>Cis</i> -acting element involved in light responsiveness                    | 1      |
| O2-site             | GATGACATGG   | <i>Cis</i> -acting regulatory element involved in zein metabolism              | 1      |
| C-repeat/DRE        | TGGCCGAC     | Regulatory element involved in cold and dehydration responsiveness             | 1      |
| C-box               | CTGACGTCAG   | <i>Cis</i> -acting regulatory element involved in light responsiveness         | 1      |
| CE3                 | GACGCGTGTC   | <i>Cis</i> -acting element involved in ABA and VP1 responsiveness              | 1      |
| G-box               | CACGT(G/C/T) | <i>Cis</i> -acting regulatory element involved in light responsiveness         | 7      |
| MRE                 | AACCTAA      | MYB binding site involved in light responsiveness                              | 1      |
| LTR                 | CCGAAA       | <i>Cis</i> -acting element involved in low-temperature responsiveness          | 1      |
| TGACG-motif         | TGACG        | <i>Cis</i> -acting regulatory element involved in the MeJA-responsiveness      | 2      |
| GARE-motif          | TCTGTTG      | Gibberellin responsive element                                                 | 1      |
| SP1                 | CCGCCC       | Light responsive element                                                       | 2      |
| as1                 | TGACGTCA     | <i>Cis</i> -acting regulatory element involved in the root specific expression | 1      |
| CGTCA-motif         | CGTCA        | <i>Cis</i> -acting regulatory element involved in the MeJA-responsiveness      | 2      |

**Table S5 Correlation between promoter methylation and expression of *DREB* genes**

| Methylation type \ Gene | Pearson's r  |              |               |
|-------------------------|--------------|--------------|---------------|
|                         | <i>DREB2</i> | <i>DREB6</i> | <i>Wdreb2</i> |
| CG                      | -0.952       | -0.981       | -0.986        |
| CHG                     | -0.327       | -0.950       | -0.973        |
| CHH                     | -0.509       | 0.656        | -0.878        |

Pearson's r represents the relationship between expression levels of *DREB2*, *DREB6*, *Wdreb2* in wheat leaves and methylation rates at CG, CHG or CHH sites in their promoter regions under the treatment of 15% PEG<sub>6000</sub> solution. According to the expression level and methylation rate when wheat seedlings incubated in PEG<sub>6000</sub> solution for 12 h, Pearson's r analysis of *DREBs* were performed.

**Table S6 Primers used in this study**

| Experiment       | Primer            | Sequence (5' to 3')           |
|------------------|-------------------|-------------------------------|
| Gene cloning     | <i>DREB2</i> -F   | CTACTCCCTGCACGGTCCT           |
|                  | <i>DREB2</i> -R   | GCCAAGCCTAATACTCCAC           |
|                  | <i>DREB6</i> -F   | CGTCCCTCTTCTCGCTCCA           |
|                  | <i>DREB6</i> -R   | CTAATATGAGAAAAGACTAAACCC      |
|                  | <i>Wdreb2</i> -F  | AAGAAAACAGGCGACAAGAT          |
|                  | <i>Wdreb2</i> -R  | ACGAAGCACAAAAAACTAGC          |
| qRT-PCR          | $\beta$ -Actin-F  | CCAAGGCGGAGTACGATGAGTCT       |
|                  | $\beta$ -Actin-R  | TTCATACAGCAGGCAAGCACCAT       |
|                  | <i>DREB2</i> -F   | GCGTACAACACCTTGATTTC          |
|                  | <i>DREB2</i> -R   | AAACTCAACTCACATCTAAGC         |
|                  | <i>DREB6</i> -F   | CGGCTGTGGCTTGGTTCATTC         |
|                  | <i>DREB6</i> -R   | CAGTTGCCCCATTAGACATC          |
|                  | <i>Wdreb2</i> -F  | AGATGTTGCTTCTTCCTTGCC         |
|                  | <i>Wdreb2</i> -R  | GATGTGCTCCTTGAAATGCTTG        |
| Promoter cloning | <i>DREB2</i> -F   | CCCAAGCTTGGTCGGCAGCACTACTATG  |
|                  | <i>DREB2</i> -R   | CATGCCATGGCATGTGCGCGCAGAGAGC  |
|                  | <i>DREB6</i> -F   | CCCAAGCTTTTCCCCACTAGAAGCATAAC |
|                  | <i>DREB6</i> -R   | AACTGCAGCCAGTAAAGGCAAGTCGTAA  |
|                  | <i>Wdreb2</i> -F  | CCCAAGCTTATCCGTTACATGGACAGC   |
|                  | <i>Wdreb2</i> -R  | AACTGCAGGATGGCCGACCCGATCCGGAT |
| BSP              | <i>DREB2</i> -F   | GTTTAGGTGTAGTAGGGTATGGAG      |
|                  | <i>DREB2</i> -R   | AAAAACACCACRTAACCC            |
|                  | <i>DREB6-1</i> -F | TTTATATTTATYGGGGAGTTTATA      |
|                  | <i>DREB6-1</i> -R | AAAACCRATAATATAAATTCCTTC      |
|                  | <i>DREB6-2</i> -F | TGTTAGYGATGTTTTTGTAT          |
|                  | <i>DREB6-2</i> -R | CAACATTTTTCRTATAATATTACCAC    |
|                  | <i>Wdreb2</i> -F  | GTTATATGTAGAYGTATAYGTGGA      |
|                  | <i>Wdreb2</i> -R  | AAAACCCCAAAAACCTCAC           |
